# Supplementary material
Source: publisher figshare collection journal article supplement (https://frontiersin.figshare.com/ndownloader/files/29152101)
Supplement: Supplementary file 1 [file 29152101]

Archive with 9 entries (8 files):
- CoastlineBuffer/
- CoastlineBuffer/50kinbuffer.cpg
- CoastlineBuffer/50kinbuffer.dbf
- CoastlineBuffer/50kinbuffer.prj
- CoastlineBuffer/50kinbuffer.sbn
- CoastlineBuffer/50kinbuffer.sbx
- CoastlineBuffer/50kinbuffer.shp
- CoastlineBuffer/50kinbuffer.shp.xml
- CoastlineBuffer/50kinbuffer.shx
