# Supplementary material
Source: publisher figshare collection journal article supplement (https://frontiersin.figshare.com/ndownloader/files/29152101)
Supplement: Supplementary file 1 [file 29152101 › CoastlineBuffer/50kinbuffer.shp.xml]

<?xml version="1.0" encoding="UTF-8"?>
<metadata xml:lang="en"><Esri><CreaDate>20201221</CreaDate><CreaTime>16002500</CreaTime><ArcGISFormat>1.0</ArcGISFormat><SyncOnce>FALSE</SyncOnce><DataProperties><itemProps><itemName Sync="TRUE">ne_10m_coastline_Buffer1_Cli1</itemName><imsContentType Sync="TRUE">002</imsContentType><itemLocation><linkage Sync="TRUE">file://\\DESKTOP-SOE5JSC\C$\Users\TOSHIBA\Documents\ArcGIS\Default.gdb</linkage><protocol Sync="TRUE">Local Area Network</protocol></itemLocation></itemProps><coordRef><type Sync="TRUE">Geographic</type><geogcsn Sync="TRUE">GCS_WGS_1984</geogcsn><csUnits Sync="TRUE">Angular Unit: Degree (0.017453)</csUnits><peXml Sync="TRUE">&lt;GeographicCoordinateSystem xsi:type='typens:GeographicCoordinateSystem' xmlns:xsi='http://www.w3.org/2001/XMLSchema-instance' xmlns:xs='http://www.w3.org/2001/XMLSchema' xmlns:typens='http://www.esri.com/schemas/ArcGIS/10.7'&gt;&lt;WKT&gt;GEOGCS[&amp;quot;GCS_WGS_1984&amp;quot;,DATUM[&amp;quot;D_WGS_1984&amp;quot;,SPHEROID[&amp;quot;WGS_1984&amp;quot;,6378137.0,298.257223563]],PRIMEM[&amp;quot;Greenwich&amp;quot;,0.0],UNIT[&amp;quot;Degree&amp;quot;,0.0174532925199433],AUTHORITY[&amp;quot;EPSG&amp;quot;,4326]]&lt;/WKT&gt;&lt;XOrigin&gt;-400&lt;/XOrigin&gt;&lt;YOrigin&gt;-400&lt;/YOrigin&gt;&lt;XYScale&gt;1111948722.2222221&lt;/XYScale&gt;&lt;ZOrigin&gt;-100000&lt;/ZOrigin&gt;&lt;ZScale&gt;10000&lt;/ZScale&gt;&lt;MOrigin&gt;-100000&lt;/MOrigin&gt;&lt;MScale&gt;10000&lt;/MScale&gt;&lt;XYTolerance&gt;8.983152841195215e-09&lt;/XYTolerance&gt;&lt;ZTolerance&gt;0.001&lt;/ZTolerance&gt;&lt;MTolerance&gt;0.001&lt;/MTolerance&gt;&lt;HighPrecision&gt;true&lt;/HighPrecision&gt;&lt;LeftLongitude&gt;-180&lt;/LeftLongitude&gt;&lt;WKID&gt;4326&lt;/WKID&gt;&lt;LatestWKID&gt;4326&lt;/LatestWKID&gt;&lt;/GeographicCoordinateSystem&gt;</peXml></coordRef><lineage><Process ToolSource="c:\program files (x86)\arcgis\desktop10.7\ArcToolbox\Toolboxes\Analysis Tools.tbx\Buffer" Date="20201221" Time="145711">Buffer ne_10m_coastline C:\Users\TOSHIBA\Documents\ArcGIS\Default.gdb\ne_10m_coastline_Buffer1 "50000 Meters" FULL ROUND NONE # PLANAR</Process><Process ToolSource="c:\program files (x86)\arcgis\desktop10.7\ArcToolbox\Toolboxes\Analysis Tools.tbx\Clip" Date="20201221" Time="155836">Clip ne_10m_coastline_Buffer1 ne_10m_land C:\Users\TOSHIBA\Documents\ArcGIS\Default.gdb\ne_10m_coastline_Buffer1_Cli1 #</Process></lineage></DataProperties><SyncDate>20201221</SyncDate><SyncTime>15580700</SyncTime><ModDate>20201221</ModDate><ModTime>15580700</ModTime></Esri><dataIdInfo><envirDesc Sync="TRUE"> Version 6.2 (Build 9200) ; Esri ArcGIS 10.7.1.11595</envirDesc><dataLang><languageCode value="eng" Sync="TRUE"></languageCode><countryCode value="USA" Sync="TRUE"></countryCode></dataLang><idCitation><resTitle Sync="TRUE">ne_10m_coastline_Buffer1_Cli1</resTitle><presForm><PresFormCd value="005" Sync="TRUE"></PresFormCd></presForm></idCitation><spatRpType><SpatRepTypCd value="001" Sync="TRUE"></SpatRepTypCd></spatRpType></dataIdInfo><mdLang><languageCode value="eng" Sync="TRUE"></languageCode><countryCode value="USA" Sync="TRUE"></countryCode></mdLang><distInfo><distFormat><formatName Sync="TRUE">File Geodatabase Feature Class</formatName></distFormat></distInfo><mdHrLv><ScopeCd value="005" Sync="TRUE"></ScopeCd></mdHrLv><mdHrLvName Sync="TRUE">dataset</mdHrLvName><refSysInfo><RefSystem><refSysID><identCode code="4326" Sync="TRUE"></identCode><idCodeSpace Sync="TRUE">EPSG</idCodeSpace><idVersion Sync="TRUE">6.14(3.0.1)</idVersion></refSysID></RefSystem></refSysInfo><spatRepInfo><VectSpatRep><geometObjs Name="ne_10m_coastline_Buffer1_Cli1"><geoObjTyp><GeoObjTypCd value="002" Sync="TRUE"></GeoObjTypCd></geoObjTyp><geoObjCnt Sync="TRUE">0</geoObjCnt></geometObjs><topLvl><TopoLevCd value="001" Sync="TRUE"></TopoLevCd></topLvl></VectSpatRep></spatRepInfo><spdoinfo><ptvctinf><esriterm Name="ne_10m_coastline_Buffer1_Cli1"><efeatyp Sync="TRUE">Simple</efeatyp><efeageom code="4" Sync="TRUE"></efeageom><esritopo Sync="TRUE">FALSE</esritopo><efeacnt Sync="TRUE">0</efeacnt><spindex Sync="TRUE">TRUE</spindex><linrefer Sync="TRUE">FALSE</linrefer></esriterm></ptvctinf></spdoinfo><eainfo><detailed Name="ne_10m_coastline_Buffer1_Cli1"><enttyp><enttypl Sync="TRUE">ne_10m_coastline_Buffer1_Cli1</enttypl><enttypt Sync="TRUE">Feature Class</enttypt><enttypc Sync="TRUE">0</enttypc></enttyp><attr><attrlabl Sync="TRUE">OBJECTID</attrlabl><attalias Sync="TRUE">FID</attalias><attrtype Sync="TRUE">OID</attrtype><attwidth Sync="TRUE">4</attwidth><atprecis Sync="TRUE">0</atprecis><attscale Sync="TRUE">0</attscale><attrdef Sync="TRUE">Internal feature number.</attrdef><attrdefs Sync="TRUE">Esri</attrdefs><attrdomv><udom Sync="TRUE">Sequential unique whole numbers that are automatically generated.</udom></attrdomv></attr><attr><attrlabl Sync="TRUE">Shape</attrlabl><attalias Sync="TRUE">Shape</attalias><attrtype Sync="TRUE">Geometry</attrtype><attwidth Sync="TRUE">0</attwidth><atprecis Sync="TRUE">0</atprecis><attscale Sync="TRUE">0</attscale><attrdef Sync="TRUE">Feature geometry.</attrdef><attrdefs Sync="TRUE">Esri</attrdefs><attrdomv><udom Sync="TRUE">Coordinates defining the features.</udom></attrdomv></attr><attr><attrlabl Sync="TRUE">featurecla</attrlabl><attalias Sync="TRUE">featurecla</attalias><attrtype Sync="TRUE">String</attrtype><attwidth Sync="TRUE">80</attwidth><atprecis Sync="TRUE">0</atprecis><attscale Sync="TRUE">0</attscale></attr><attr><attrlabl Sync="TRUE">scalerank</attrlabl><attalias Sync="TRUE">scalerank</attalias><attrtype Sync="TRUE">Integer</attrtype><attwidth Sync="TRUE">4</attwidth><atprecis Sync="TRUE">0</atprecis><attscale Sync="TRUE">0</attscale></attr><attr><attrlabl Sync="TRUE">min_zoom</attrlabl><attalias Sync="TRUE">min_zoom</attalias><attrtype Sync="TRUE">Single</attrtype><attwidth Sync="TRUE">4</attwidth><atprecis Sync="TRUE">0</atprecis><attscale Sync="TRUE">0</attscale></attr><attr><attrlabl Sync="TRUE">BUFF_DIST</attrlabl><attalias Sync="TRUE">BUFF_DIST</attalias><attrtype Sync="TRUE">Double</attrtype><attwidth Sync="TRUE">8</attwidth><atprecis Sync="TRUE">0</atprecis><attscale Sync="TRUE">0</attscale></attr><attr><attrlabl Sync="TRUE">ORIG_FID</attrlabl><attalias Sync="TRUE">ORIG_FID</attalias><attrtype Sync="TRUE">Integer</attrtype><attwidth Sync="TRUE">4</attwidth><atprecis Sync="TRUE">0</atprecis><attscale Sync="TRUE">0</attscale></attr><attr><attrlabl Sync="TRUE">Shape_Length</attrlabl><attalias Sync="TRUE">Shape_Length</attalias><attrtype Sync="TRUE">Double</attrtype><attwidth Sync="TRUE">8</attwidth><atprecis Sync="TRUE">0</atprecis><attscale Sync="TRUE">0</attscale><attrdef Sync="TRUE">Length of feature in internal units.</attrdef><attrdefs Sync="TRUE">Esri</attrdefs><attrdomv><udom Sync="TRUE">Positive real numbers that are automatically generated.</udom></attrdomv></attr><attr><attrlabl Sync="TRUE">Shape_Area</attrlabl><attalias Sync="TRUE">Shape_Area</attalias><attrtype Sync="TRUE">Double</attrtype><attwidth Sync="TRUE">8</attwidth><atprecis Sync="TRUE">0</atprecis><attscale Sync="TRUE">0</attscale><attrdef Sync="TRUE">Area of feature in internal units squared.</attrdef><attrdefs Sync="TRUE">Esri</attrdefs><attrdomv><udom Sync="TRUE">Positive real numbers that are automatically generated.</udom></attrdomv></attr></detailed></eainfo><mdDateSt Sync="TRUE">20201221</mdDateSt></metadata>
